# Supplementary material for: Doxycycline Inhibits IL-17-Stimulated MMP-9 Expression by Downregulating ERK1/2 Activation: Implications in Myogenic Differentiation
Source: Hindawi journal article supplement (doi:10.1155/2016/2939658), 2016-01-01
Supplement: f1 [file 2939658.f1.pdf]

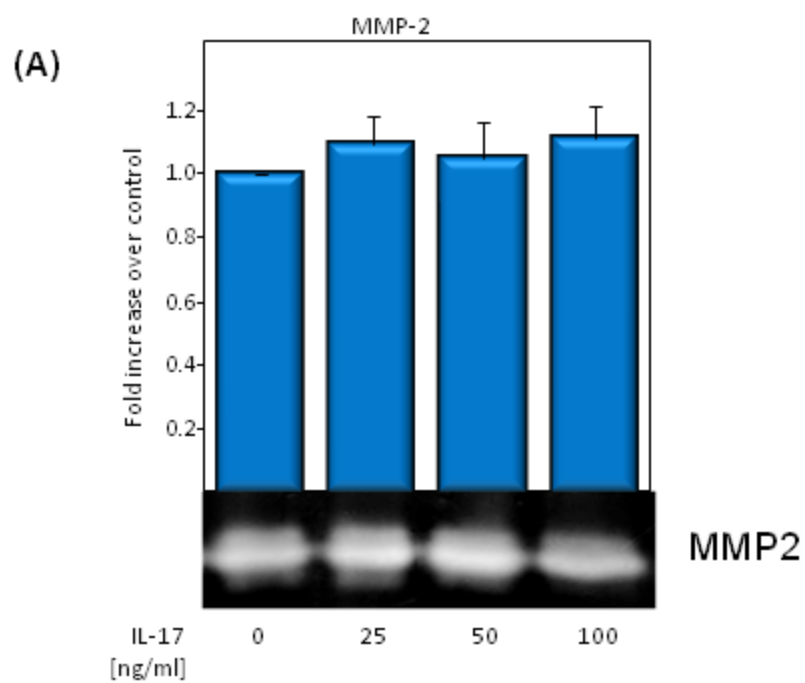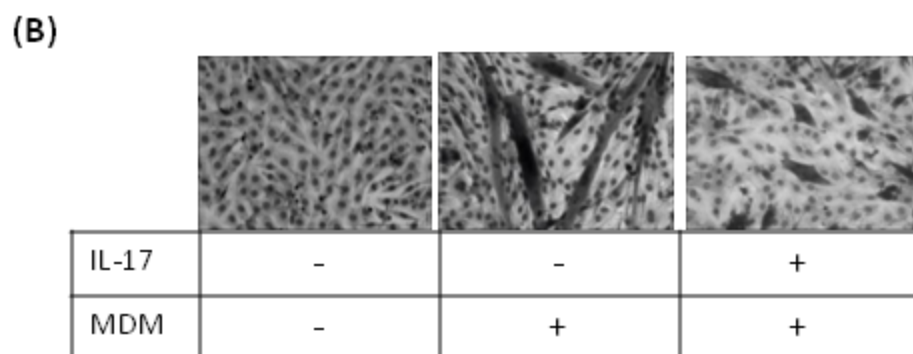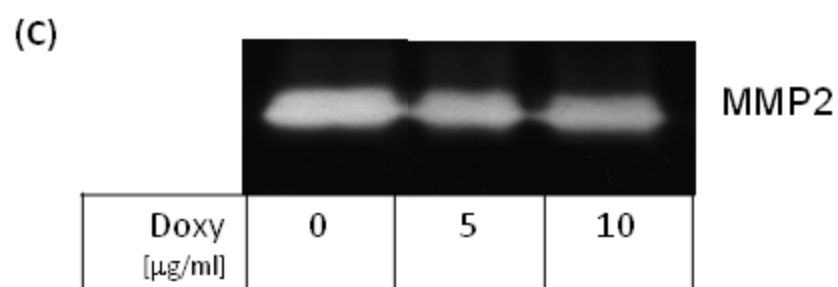

| Gene         | Primer sequence                                                                             | Size (bp) | Temp (°C) | Number of cycles | Ref. |
|--------------|---------------------------------------------------------------------------------------------|-----------|-----------|------------------|------|
| <b>MMP9</b>  | Forward: 5'-ACC-ACC-ACA-ACT-GAA-CCACA-3'<br>Reverse: 5'-ACC-AAC-CGT-CCT-TGA-AGA-AA-3'       | 304       | 50        | 28               | (1)  |
| <b>MMP-2</b> | Forward :5'-GGCTGGAACACTCTCAGGAC-3'<br>Reverse: 5'-CGATGCCATCAAAGACAATG-3'                  | 213       | 50        | 28               | (2)  |
| <b>MCK</b>   | Forward: 5'-CAA-TAA-GCT-TCG-CGA-TAA-GGA-G-3'<br>Reverse: 5'- AGG-AAG-CTT-TTG-TTG-TCG-TTG-3' | 561       | 48        | 30               | (3)  |
| <b>GADPH</b> | Forward: 5'-ACCACAGTCCATGCCATCAC-3'<br>Reverse: 5'-TCCACCACCCTGTTGCTGTA-3'                  | 452       | 52        | 26               | (1)  |

Supplementary table 1: primer sequences and PCR settings.

#### References

(1) J.F. Santibanez, J. Kocić, A. Fabra, A. Cano, M. Quintanilla, "Rac1 modulates TGF-beta1-mediated epithelial cell plasticity and MMP9 production in transformed keratinocytes". *FEBS Lett* vol 584, no. 11, pp. 2305-2310, 2010.

(2) Kurata K, Maruyama S, Kato S, Sato W, Yamamoto J, Ozaki T, Nitta A, Nabeshima T, Morita Y, Mizuno M, Ito Y, Yuzawa Y, Matsuo S. Tissue-type plasminogen activator deficiency attenuates peritoneal fibrosis in mice. *Am J Physiol Renal Physiol* 2009;297(6):F1510-7.

(3) Y. Gutierrez-Martin, F.J. Martin-Romero, F. Henao, "Store-operated calcium entry in differentiated C2C12 skeletal muscle cells". *Biochim. Biophys. Acta*, vol 1711, no.1, pp. 33-40, 2005.
